# Supplementary material for: Impact of Childhood Obesity and Psychological Factors on Sleep
Source: Front Psychiatry. 2021 Jul 9;12:657322. doi: 10.3389/fpsyt.2021.657322 (PMC8298750; doi:10.3389/fpsyt.2021.657322)
Supplement: Supplementary file 2 [file Table_2.XLSX]

## Sheet: Tabelle1
Table 2 Suppl. Spearman correlation matrix between sleep variables and possible predictors
		Pediatrics Sleep Habits Questionnaire	Sleep Self Report (SSR)	Pediatric Daytime Sleepiness Scale	Sleep duration (parent reported)	Children’s Sleep Habits Questionnaire	Epworth Sleepiness Scale
SDS Score (Weight)	Correlation coefficient	0.417	0.224	-0.00898101	-0.0605909	0.338	0.218
	FDR	0.0005	0.0867	0.9603	0.6665	0.0062	0.0965
	N	87	87	87	87	87	87
STAIC Sum Score	Correlation coefficient	0.194049	0.423	0.349	-0.148008	0.124754	0.126223
	FDR	0.1434	0.0004	0.0045	0.2733	0.3589	0.3564
	N	87	87	87	87	87	87
SIKJ Sum Score	Correlation coefficient	0.0847103	0.357	0.264	-0.0854066	0.140839	0.251
	FDR	0.5537	0.0036	0.0397	0.5514	0.2979	0.0509
	N	87	87	87	87	87	87
Rosenberg Sum Score (Self-esteem)	Correlation coefficient	-0.190451	-0.393	-0.223	0.161378	-0.211	-0.124093
	FDR	0.1501	0.0011	0.0887	0.2306	0.1064	0.3589
	N	87	87	87	87	87	87
SSKJ Vulnerability Score	Correlation coefficient	0.0981477	0.256	0.148253	-0.159993	0.117042	0.0653767
	FDR	0.4854	0.0467	0.2733	0.2336	0.3927	0.6541
	N	87	87	87	87	87	87
SSKJ "Seeking social support" Coping Strategy	Correlation coefficient	0.013307	-0.0439834	-0.00375279	0.092833	-0.0620601	-0.00843701
	FDR	0.9401	0.7633	0.976	0.5158	0.6652	0.9603
	N	87	87	87	87	87	87
SSKJ "Problem Oriented" Coping Strategy	Correlation coefficient	-0.0391855	-0.218	-0.244	0.106834	-0.182866	-0.116137
	FDR	0.787	0.0965	0.058	0.4393	0.1702	0.3953
	N	87	87	87	87	87	87
SSKJ "Constructive-Palliative Emotion Regulation" Coping Strategy	Correlation coefficient	-0.231	-0.0291469	0.0243545	-0.0120651	-0.0506249	-0.0807146
	FDR	0.0764	0.8372	0.87	0.946	0.7197	0.5738
	N	87	87	87	87	87	87
SSKJ "Avoident" Coping Strategy	Correlation coefficient	-0.0636535	0.181959	,321**	-0.0982464	0.0758588	,213*
	FDR	0.6582	0.1721	0.0096	0.4854	0.5975	0.1047
	N	87	87	87	87	87	87
SSKJ "Destructive-Anger-Related" coping strategy	Correlation coefficient	0.000910673	0.475	0.375	-0.191714	0.161986	0.124061
	FDR	0.9933	0.0001	0.002	0.1483	0.2295	0.3589
	N	87	87	87	87	87	87
SSKJ Psysical Stress Sum Score	Correlation coefficient	-0.0351027	0.385	0.308	0.0648329	0.180512	0.0617574
	FDR	0.8084	0.0014	0.0134	0.6552	0.1747	0.6652
	N	87	87	87	87	87	87
SSKJ Mental Stress Sum Score	Correlation coefficient	0.107641	0.299	0.218	-0.00826982	0.0341411	0.0222481
	FDR	0.4386	0.0164	0.0965	0.9603	0.8124	0.8793
	N	87	87	87	87	87	87
DIKJ Sum Score	Correlation coefficient	0.121841	0.342	0.231	-0.23	0.171276	0.0882629
	FDR	0.3693	0.0056	0.0764	0.0779	0.1994	0.5394
	N	87	87	87	87	87	87
Parent reported quality of life	Correlation coefficient	-0.318	-0.303	-0.156257	0.127255	-0.426	-0.431
	FDR	0.0105	0.0148	0.2438	0.3526	0.0004	0.0003
	N	87	87	87	87	87	87
Age	Correlation coefficient	0.0435255	0.0584337	0.264	-0.475	0.188729	0.19661
	FDR	0.7636	0.675	0.0397	0.0001	0.1533	0.1369
	N	87	87	87	87	87	87
Gender	Correlation coefficient	-0.105129	-0.299	-0.31	0.256	-0.170647	-0.13953
	FDR	0.4477	0.0163	0.0126	0.0467	0.2005	0.301
	N	87	87	87	87	87	87
Children reported quaality of life	Correlation coefficient	-0.237	-0.412	-0.329	0.142943	-0.334	-0.248
	FDR	0.0691	0.0006	0.0079	0.2893	0.0069	0.0541
	N	87	87	87	87	87	87
Yellow marked variables were selected for regression modelling. "Group (participants with normal-weight versus obesity)" was included in all regression modellsto analyze the influence of weight status on relation between sleep variables and psychometric data. FDR= False Discovery Rate (p-values adjusted for multiple testing); SDS - standrad deviation score; SSKJ - Stress and Stress coping questio…
